# Supplementary material
Source: MDPI journal article supplement (https://www.mdpi.com/2071-1050/14/6/3159)
Supplement: s1 [file s1 › sustainability-1570431-supplementary.pdf]

## Supplementary File—List of 16 meetings

Article: *Meeting design supporting sustainability in early planning practice: a combination of 'hard & soft' characteristics*

| Case Title & Time                                              | Participants                                                                                                                                                                                                                  | Room and seating                                                                                                         |
|----------------------------------------------------------------|-------------------------------------------------------------------------------------------------------------------------------------------------------------------------------------------------------------------------------|--------------------------------------------------------------------------------------------------------------------------|
| <b>Physical meetings</b>                                       |                                                                                                                                                                                                                               |                                                                                                                          |
| 1. NDS Innovation Forum, part 1<br>Time: 3h, 2015.09           | 20 people: property owners, developers, contracted architects, city representatives, sustainability specialists.                                                                                                              | Flexible room and seating, but no real windows. Air quality was bad after a while. Mentimeter                            |
| 2. NDS Innovation Forum, part 2<br>Time: 4h, 2015.09           | ca 35 people: property owners, developers and contracted architects, city representative, sustainability specialists, researchers, lawyer, communication, school principal, youth administrator.                              | Flexible room and seating, but no real windows. Air quality was bad after a while. Mentimeter                            |
| 3. Culture House Sustainability<br>Time: 4h, 2016.10           | 13 people: architects, sust. experts, structural engineer, clients municipality, systems engineers, project leader, facade specialist.                                                                                        | Nice flexible room and seating, half-moon and round table seating.                                                       |
| 4. Housing Developer Sustainability goals<br>Time: 4h, 2016.10 | Ca 35 people: business developers, project leaders, procurement, market and communication, coming from different regions.                                                                                                     | Nice flexible room and seating, half-moon and round table seating. Mentimeter                                            |
| 5. Ebbe park Sustainability analysis<br>Time: 2h, 2016.05      | 5 people: Architect, Sustainability expert, Digital Methodology expert, Energy engineer,                                                                                                                                      | Very small room with one large window. Difficult to move in the space. Mentimeter                                        |
| 6. Eco canopy initiation, part.1<br>Time: 3h, 2017.05          | 12 people: Architect, Project Lead client, Developer, Researcher, Student/User, Sustainability Expert, Energy expert, Property owner, Systems Engineer, Digital strategist, Community manager, Business developer, Biologist. | Very small room with one large window. Bad air quality and difficult to move in the space. Mentimeter                    |
| 7. Making Sence<br>Time: 1h, 2017.12                           | Ca 45 people: architects, engineers, digital experts, researchers from mainly European countries.                                                                                                                             | Nice large room with view. No organized seating. Mentimeter                                                              |
| 8. Business Arena lunch<br>Time: 1h, 2019.04                   | 8 people: Architects, Project Managers, Municipality (housing), Developers.                                                                                                                                                   | Large room, no windows. Difficult to find, (caused delay and frustration). Seating around a large oval table. Mentimeter |
| Case Title & Time                                              | Participants                                                                                                                                                                                                                  | Room and seating                                                                                                         |

| Digital meetings                                                |                                                                                                                                                                                                                                                                      |                                                     |
|-----------------------------------------------------------------|----------------------------------------------------------------------------------------------------------------------------------------------------------------------------------------------------------------------------------------------------------------------|-----------------------------------------------------|
| 9. Corona Hack-the-crisis<br>Time: 1h, 2020.03                  | 7 people: Architects, Project Manager, Engineers Digital IT-, Environmental-, 3 Systems- engineer                                                                                                                                                                    | Zoom-video, ideaboardz                              |
| 10. Climate goals B&F<br>Time: 2h, 2020.04                      | 6 people: architect, structural engineer, societal analysts., IT engineer, systems engineer, project manager.                                                                                                                                                        | Teams-video, Mentimeter                             |
| 11. Sustainability National plan<br>Time: 1h 15 min, 2020.04    | 15 people: Chief sustainability, Systems engineer, Environmental engineer, Architect, Structural engineer, Social analyst, Infrastructure specialist, IT engineer, Project Management, Industry expert, Energy expert.                                               | Teams-video, break-out rooms, telephone, Mentimeter |
| 11. Sustainable growth VD/RC<br>Time: 1h 15 min, 2020.05        | 12 people: CEOs and Regional Operations Managers from 5 different companies within Sweco Group; Architects, Systems engineers, IT engineers, Project Management, Societal analysts, Communication & marketing, CEO assistant.                                        | Teams-video, break-out rooms, telephone,            |
| 12. Fågel Fenix 1<br>Time: 1,5 h, 2020.05                       | 10. people: Leading positions from different companies within Sweco Group: IT specialist, Project Management, Architect, Systems engineer.                                                                                                                           | Teams-video, telephone, ideaboardz                  |
| 13. Fågel Fenix 2<br>Time: 1,5 h, 2020.05                       | 5. people: Leading positions from different companies within Sweco Group: IT specialist, Project Management, Architect, Systems engineer.                                                                                                                            | Teams-video, telephone, ideaboardz                  |
| 14. Fågel Fenix 3<br>Time: 1,5 h, 2020.05                       | 7. people: Project Manager, Architect, IT engineers, Environmental Infrastructure, Chief Sustainability, Communication graphic-designer.                                                                                                                             | Teams-video, telephone, ideaboardz                  |
| 15. Fågel Fenix net-0-communities<br>Time: 1,5 h, 2020.06       | 17 people. Project Management, Architect, Landscape architect, Energy and community advisors, Municipality Politicians and clerks, Swedish gouvernement sustainable communities, Academic researchers, Private sector; bank clerk, car dealer, farmer, change-maker. | Teams-video, ideaboardz                             |
| 15. Sustainable Banking and real estate<br>Time: 1,5 h, 2020.04 | 12 people: Bank and real estate planning sector: Chief Sustainability Group, Sustainable Business developer, Capital market, Architect, Environmental engineer, Project Manager, Systems engineer.                                                                   | Skype, Mentimeter                                   |
